# Supplementary material for: A series of 1D, 2D and 3D coordination polymers based on a 5-(benzonic-4-ylmethoxy)isophthalic acid: syntheses, structures and photoluminescence
Source: Royal Society of Chemistry journal article supplement (doi:10.1039/c1ce05639e), 2011-10-18
Supplement: c1ce05639e.pdf [file c1ce05639e.pdf]

## Electronic supplementary information

### **A series of 1D, 2D and 3D coordination polymers based on a 5-(benzoic-4-ylmethoxy)isophthalic acid: syntheses, structures and photoluminescence**

Ying-Ying Liu, Jing Li, Jian-Fang Ma,\* Ji-Cheng Ma, Jin Yang\*

*Key Lab for Polyoxometalate Science, Department of Chemistry, Northeast Normal University, Changchun 130024, People's Republic of China*

\* Correspondence authors

E-mail: jianfangma@yahoo.com.cn (J.-F. Ma)

Fax: +86-431-85098620 (J.-F. Ma)

E-mail: yangjinnenu@yahoo.com.cn (J. Yang)

**Table S1.** Selected bond distances (Å) and angles (°) for compounds **1-7**.

|                                              |            |                                              |            |
|----------------------------------------------|------------|----------------------------------------------|------------|
| <b>1</b>                                     |            |                                              |            |
| Zn(1)-O(7)                                   | 1.9275(16) | Zn(1)-O(5) <sup>#1</sup>                     | 1.9451(15) |
| Zn(1)-O(4) <sup>#2</sup>                     | 1.9494(15) | Zn(1)-O(1W)                                  | 2.105(2)   |
| Zn(1)-O(2) <sup>#3</sup>                     | 2.4591(15) |                                              |            |
| O(7)-Zn(1)-O(5) <sup>#1</sup>                | 110.13(8)  | O(7)-Zn(1)-O(4) <sup>#2</sup>                | 141.42(7)  |
| O(5) <sup>#1</sup> -Zn(1)-O(4) <sup>#2</sup> | 105.41(7)  | O(7)-Zn(1)-O(1W)                             | 97.93(7)   |
| O(5) <sup>#1</sup> -Zn(1)-O(1W)              | 91.09(7)   | O(4) <sup>#2</sup> -Zn(1)-O(1W)              | 95.89(7)   |
| O(7)-Zn(1)-O(2) <sup>#3</sup>                | 93.53(7)   | O(5) <sup>#1</sup> -Zn(1)-O(2) <sup>#3</sup> | 85.50(6)   |
| O(4) <sup>#2</sup> -Zn(1)-O(2) <sup>#3</sup> | 74.54(6)   | O(1W)-Zn(1)-O(2) <sup>#3</sup>               | 168.52(7)  |
| <b>2</b>                                     |            |                                              |            |
| Zn(1)-O(4) <sup>#1</sup>                     | 1.9911(14) | Zn(1)-N(1)                                   | 2.0948(14) |
| Zn(1)-N(2)                                   | 2.1428(18) | Zn(1)-O(2)                                   | 2.1674(18) |
| Zn(1)-O(1)                                   | 2.2924(16) | Zn(1)-O(6) <sup>#2</sup>                     | 2.3044(15) |
| O(4) <sup>#1</sup> -Zn(1)-N(1)               | 123.25(5)  | O(4) <sup>#1</sup> -Zn(1)-N(2)               | 95.27(5)   |
| N(1)-Zn(1)-N(2)                              | 78.83(6)   | O(4) <sup>#1</sup> -Zn(1)-O(2)               | 142.71(6)  |
| N(1)-Zn(1)-O(2)                              | 93.06(6)   | N(2)-Zn(1)-O(2)                              | 100.42(6)  |
| O(4) <sup>#1</sup> -Zn(1)-O(1)               | 87.67(5)   | N(1)-Zn(1)-O(1)                              | 148.27(5)  |
| N(2)-Zn(1)-O(1)                              | 92.51(6)   | O(2)-Zn(1)-O(1)                              | 58.22(5)   |
| O(4) <sup>#1</sup> -Zn(1)-O(6) <sup>#2</sup> | 88.63(5)   | N(1)-Zn(1)-O(6) <sup>#2</sup>                | 89.75(6)   |
| N(2)-Zn(1)-O(6) <sup>#2</sup>                | 168.24(5)  | O(2)-Zn(1)-O(6) <sup>#2</sup>                | 82.81(5)   |
| O(1)-Zn(1)-O(6) <sup>#2</sup>                | 98.74(6)   |                                              |            |
| <b>3</b>                                     |            |                                              |            |
| Zn(1)-O(7)                                   | 1.9683(15) | Zn(1)-N(5)                                   | 2.0129(19) |
| Zn(1)-O(2) <sup>#1</sup>                     | 2.029(2)   | Zn(1)-N(1)                                   | 2.0763(19) |
| Zn(1)-O(1) <sup>#1</sup>                     | 2.461(2)   |                                              |            |
| O(7)-Zn(1)-N(5)                              | 120.74(8)  | O(7)-Zn(1)-O(2) <sup>#1</sup>                | 113.26(7)  |
| N(5)-Zn(1)-O(2) <sup>#1</sup>                | 115.42(9)  | O(7)-Zn(1)-N(1)                              | 102.69(7)  |
| N(5)-Zn(1)-N(1)                              | 106.56(7)  | O(2) <sup>#1</sup> -Zn(1)-N(1)               | 92.76(9)   |
| O(7)-Zn(1)-O(1) <sup>#1</sup>                | 95.07(7)   | N(5)-Zn(1)-O(1) <sup>#1</sup>                | 86.25(8)   |
| O(2) <sup>#1</sup> -Zn(1)-O(1) <sup>#1</sup> | 55.43(9)   | N(1)-Zn(1)-O(1) <sup>#1</sup>                | 147.89(9)  |
| <b>4</b>                                     |            |                                              |            |
| Zn(1)-O(6)                                   | 1.9695(15) | Zn(1)-O(11) <sup>#1</sup>                    | 1.9790(14) |
| Zn(1)-N(1)                                   | 2.010(2)   | Zn(1)-N(12)                                  | 2.0409(16) |
| Zn(2)-O(8)                                   | 1.9793(15) | Zn(2)-O(4) <sup>#2</sup>                     | 2.0052(14) |

|                                  |           |                  |            |
|----------------------------------|-----------|------------------|------------|
| Zn(2)-N(8)                       | 2.012(2)  | Zn(2)-N(6)       | 2.0536(17) |
| O(6)-Zn(1)-O(11) <sup>#1</sup>   | 95.98(7)  | O(6)-Zn(1)-N(1)  | 120.29(7)  |
| O(11) <sup>#1</sup> -Zn(1)-N(1)  | 109.65(7) | O(6)-Zn(1)-N(12) | 113.25(7)  |
| O(11) <sup>#1</sup> -Zn(1)-N(12) | 112.24(7) | N(1)-Zn(1)-N(12) | 105.33(8)  |
| O(8)-Zn(2)-O(4) <sup>#2</sup>    | 99.02(6)  | O(8)-Zn(2)-N(8)  | 115.98(7)  |
| O(4) <sup>#2</sup> -Zn(2)-N(8)   | 111.03(7) | O(8)-Zn(2)-N(6)  | 109.15(7)  |
| O(4) <sup>#2</sup> -Zn(2)-N(6)   | 116.15(7) | N(8)-Zn(2)-N(6)  | 105.84(7)  |

## 5

|                                              |            |                                |            |
|----------------------------------------------|------------|--------------------------------|------------|
| Zn(1)-O(7)                                   | 1.9358(12) | Zn(1)-O(2) <sup>#1</sup>       | 1.9491(11) |
| Zn(1)-O(1) <sup>#2</sup>                     | 1.9957(13) | Zn(1)-N(1)                     | 2.0004(15) |
| O(7)-Zn(1)-O(2) <sup>#1</sup>                | 115.30(5)  | O(7)-Zn(1)-O(1) <sup>#2</sup>  | 104.90(5)  |
| O(2) <sup>#1</sup> -Zn(1)-O(1) <sup>#2</sup> | 114.22(6)  | O(7)-Zn(1)-N(1)                | 120.50(6)  |
| O(2) <sup>#1</sup> -Zn(1)-N(1)               | 101.16(6)  | O(1) <sup>#2</sup> -Zn(1)-N(1) | 100.19(6)  |

## 6

|                                              |            |                                              |            |
|----------------------------------------------|------------|----------------------------------------------|------------|
| Zn(1)-O(1)                                   | 1.9732(17) | Zn(1)-N(2)                                   | 2.021(2)   |
| Zn(1)-N(6) <sup>#1</sup>                     | 2.023(2)   | Zn(1)-O(3) <sup>#2</sup>                     | 2.1178(19) |
| Zn(1)-O(4) <sup>#2</sup>                     | 2.2648(19) |                                              |            |
| O(1)-Zn(1)-N(2)                              | 93.47(8)   | O(1)-Zn(1)-N(6) <sup>#1</sup>                | 101.68(8)  |
| N(2)-Zn(1)-N(6) <sup>#1</sup>                | 106.60(9)  | O(1)-Zn(1)-O(3) <sup>#2</sup>                | 102.92(8)  |
| N(2)-Zn(1)-O(3) <sup>#2</sup>                | 88.53(9)   | N(6) <sup>#1</sup> -Zn(1)-O(3) <sup>#2</sup> | 150.16(8)  |
| O(1)-Zn(1)-O(4) <sup>#2</sup>                | 131.50(8)  | N(2)-Zn(1)-O(4) <sup>#2</sup>                | 126.74(8)  |
| N(6) <sup>#1</sup> -Zn(1)-O(4) <sup>#2</sup> | 92.21(8)   | O(3) <sup>#2</sup> -Zn(1)-O(4) <sup>#2</sup> | 58.64(7)   |

## 7

|                                              |            |                                 |            |
|----------------------------------------------|------------|---------------------------------|------------|
| Cu(1)-O(8) <sup>#1</sup>                     | 1.9324(17) | Cu(1)-O(5) <sup>#2</sup>        | 1.9480(15) |
| Cu(1)-O(1)                                   | 1.9600(16) | Cu(1)-O(2)                      | 1.9718(15) |
| Cu(1)-O(1W)                                  | 2.287(3)   | Cu(2)-O(4) <sup>#3</sup>        | 1.9156(15) |
| Cu(2)-O(3)                                   | 1.9550(15) | Cu(2)-O(1)                      | 1.9686(15) |
| Cu(2)-O(1) <sup>#4</sup>                     | 1.9935(15) | Cu(2)-O(7) <sup>#5</sup>        | 2.374(2)   |
| Cu(2)...Cu(2) <sup>#4</sup>                  | 3.0274(5)  |                                 |            |
| O(8) <sup>#1</sup> -Cu(1)-O(5) <sup>#2</sup> | 84.63(7)   | O(8) <sup>#1</sup> -Cu(1)-O(1)  | 174.81(8)  |
| O(5) <sup>#2</sup> -Cu(1)-O(1)               | 92.41(6)   | O(8) <sup>#1</sup> -Cu(1)-O(2)  | 92.91(7)   |
| O(5) <sup>#2</sup> -Cu(1)-O(2)               | 151.81(8)  | O(1)-Cu(1)-O(2)                 | 91.71(7)   |
| O(8) <sup>#1</sup> -Cu(1)-O(1W)              | 91.33(10)  | O(5) <sup>#2</sup> -Cu(1)-O(1W) | 114.03(9)  |
| O(1)-Cu(1)-O(1W)                             | 85.98(9)   | O(2)-Cu(1)-O(1W)                | 94.06(8)   |
| O(4) <sup>#3</sup> -Cu(2)-O(3)               | 84.57(6)   | O(4) <sup>#3</sup> -Cu(2)-O(1)  | 174.10(7)  |

|                                               |           |                                               |           |
|-----------------------------------------------|-----------|-----------------------------------------------|-----------|
| O(3)-Cu(2)-O(1)                               | 99.76(6)  | O(4) <sup>#3</sup> -Cu(2)-O(1) <sup>#4</sup>  | 97.11(6)  |
| O(3)-Cu(2)-O(1) <sup>#4</sup>                 | 158.32(9) | O(1)-Cu(2)-O(1) <sup>#4</sup>                 | 80.35(7)  |
| O(4) <sup>#3</sup> -Cu(2)-O(7) <sup>#5</sup>  | 93.29(8)  | O(3)-Cu(2)-O(7) <sup>#5</sup>                 | 97.46(9)  |
| O(1)-Cu(2)-O(7) <sup>#5</sup>                 | 82.23(8)  | O(1) <sup>#4</sup> -Cu(2)-O(7) <sup>#5</sup>  | 103.99(8) |
| O(4) <sup>#3</sup> -Cu(2)-Cu(2) <sup>#4</sup> | 136.75(5) | O(3)-Cu(2)-Cu(2) <sup>#4</sup>                | 136.24(5) |
| O(1)-Cu(2)-Cu(2) <sup>#4</sup>                | 40.48(5)  | O(1) <sup>#4</sup> -Cu(2)-Cu(2) <sup>#4</sup> | 39.87(4)  |
| O(7) <sup>#5</sup> -Cu(2)-Cu(2) <sup>#4</sup> | 94.09(6)  |                                               |           |

Symmetry codes for **1**: <sup>#1</sup> -x+2, -y, -z+2; <sup>#2</sup> x, -y-1/2, z-1/2; <sup>#3</sup> -x+1, y+3/2, -z+3/2. For **2**: <sup>#1</sup> x-1, y, z; <sup>#2</sup> -x,-y+2,-z+2. For **3**: <sup>#1</sup> x, y+1, z+1. For **4**: <sup>#1</sup> -x+1, -y+1, -z+1; <sup>#2</sup> -x+2, -y+1, -z. For **5**: <sup>#1</sup> -x+2, y+1/2, -z+3/2; <sup>#2</sup> -x+2,-y,-z+2. For **6**: <sup>#1</sup> -x+3/2, y+1/2, -z+1; <sup>#2</sup> x+1/2, -y+1/2, -z-1. For **7**: <sup>#1</sup> -x+4, -y+1, -z+3; <sup>#2</sup> x, y-1, z; <sup>#3</sup> -x+2, -y+2, -z+2; <sup>#4</sup> -x+2, -y+1, -z+2; <sup>#5</sup> x-1, y, z-1.

**Table S2.** Hydrogen-bonding parameters for **1-7** (in Å and deg)

|                                   | D-H...A   | d(D-H)    | d(D...A)   | ∠(D-H...A) |
|-----------------------------------|-----------|-----------|------------|------------|
| <b>1</b>                          |           |           |            |            |
| O(1W)-H(1A)...O(4) <sup>#4</sup>  | 0.841(18) | 2.33(2)   | 3.110(2)   | 154(3)     |
| O(1W)-H(1B)...O(6) <sup>#5</sup>  | 0.82(3)   | 2.02(3)   | 2.808(3)   | 161(3)     |
| <b>2</b>                          |           |           |            |            |
| O(7)-H(7A)...O(3) <sup>#5</sup>   | 0.82      | 1.84      | 2.5806(18) | 150.2      |
| O(1W)-H(1A)...O(1)                | 0.936(18) | 2.047(19) | 2.968(3)   | 168(3)     |
| O(1W)-H(1B)...O(1) <sup>#6</sup>  | 0.915(18) | 2.110(19) | 3.017(3)   | 171(3)     |
| O(2W)-H(2A)...O(2) <sup>#4</sup>  | 0.904(19) | 2.09(2)   | 2.932(6)   | 155(5)     |
| <b>4</b>                          |           |           |            |            |
| O(1W)-H(1B)...O(2W) <sup>#3</sup> | 0.835(17) | 2.192(18) | 3.025(3)   | 176(4)     |
| O(1W)-H(1A)...O(2)                | 0.875(17) | 2.20(2)   | 3.052(4)   | 163(5)     |
| O(2W)-H(2A)...O(9)                | 0.893(18) | 1.99(2)   | 2.838(3)   | 158(7)     |
| O(1)-H(1)...O(5) <sup>#4</sup>    | 0.82      | 1.81      | 2.588(2)   | 157.7      |
| O(14)-H(14)...O(10) <sup>#5</sup> | 0.82      | 1.78      | 2.566(2)   | 160.1      |
| <b>5</b>                          |           |           |            |            |
| O(5)-H(5A)...O(6) <sup>#3</sup>   | 0.82      | 1.85      | 2.6421(18) | 162.7      |
| <b>6</b>                          |           |           |            |            |
| O(6)-H(6A)...O(4) <sup>#3</sup>   | 0.82      | 1.86      | 2.679(3)   | 174.2      |
| <b>7</b>                          |           |           |            |            |

|                                  |           |          |           |        |
|----------------------------------|-----------|----------|-----------|--------|
| O(1W)-H(1A)...O(6) <sup>#6</sup> | 0.842(19) | 2.38(3)  | 3.141(3)  | 150(4) |
| O(1W)-H(1B)...O(7) <sup>#7</sup> | 0.851(19) | 2.09(2)  | 2.895(3)  | 158(4) |
| O(1)-H(1)...O(2) <sup>#8</sup>   | 0.79(3)   | 2.05(3)  | 2.790(3)  | 156(3) |
| O(2W)-H(2A)...O(1W)              | 0.92(2)   | 2.56(10) | 3.119(17) | 119(9) |

Symmetry code for **1**: <sup>#4</sup> -x+2, -y-1, -z+2; <sup>#5</sup> -x+2, y+1/2, -z+3/2. For **2**: <sup>#4</sup> -x+1, -y+1, -z+1; <sup>#5</sup> x-1, y+1, z+1; <sup>#6</sup> -x, -y+1, -z+2. For **4**: <sup>#3</sup> -x+2, -y, -z; <sup>#4</sup> x, y-1, z; <sup>#5</sup> x, y+1, z. For **5**: <sup>#3</sup> -x+1, y-1/2, -z+5/2. For **6**: <sup>#3</sup> -x+1, -y, z+1. For **7**: <sup>#6</sup> x-1, y, z; <sup>#7</sup> -x+3, -y+1, -z+3; <sup>#8</sup> -x+3, -y+1, -z+2.

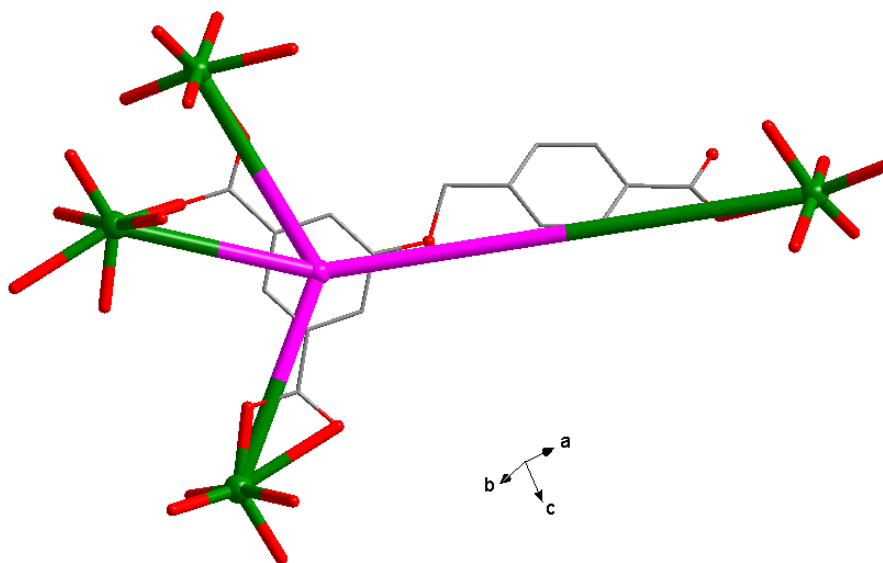

**Fig. S1.** View of the four-connected node of HL anion in **1**.

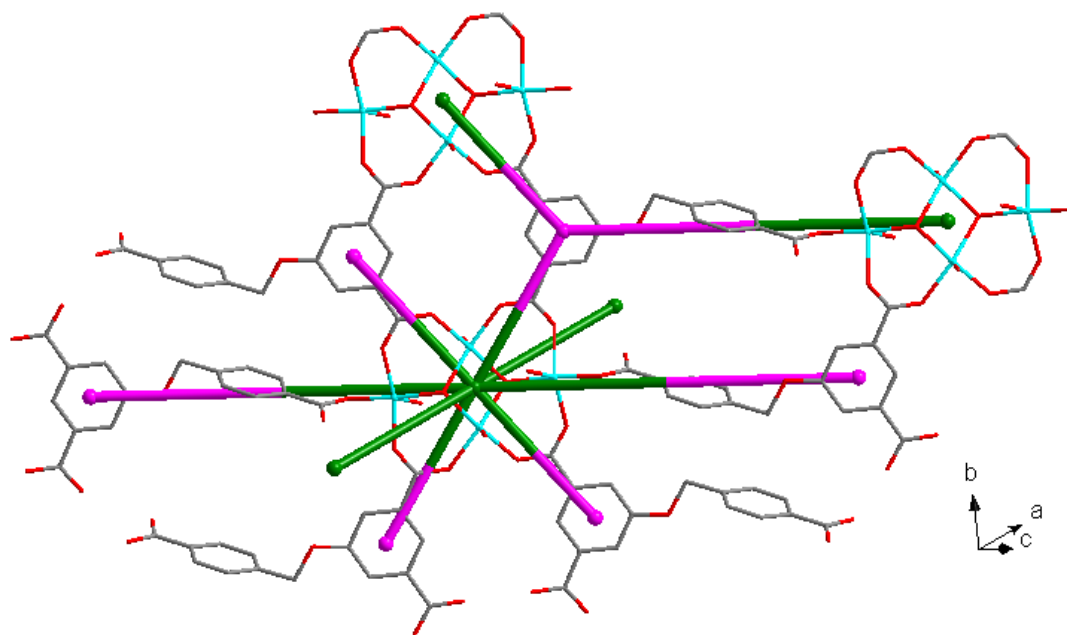

**Fig. S2.** View of the eight-connected and three-connected nodes of **7**.

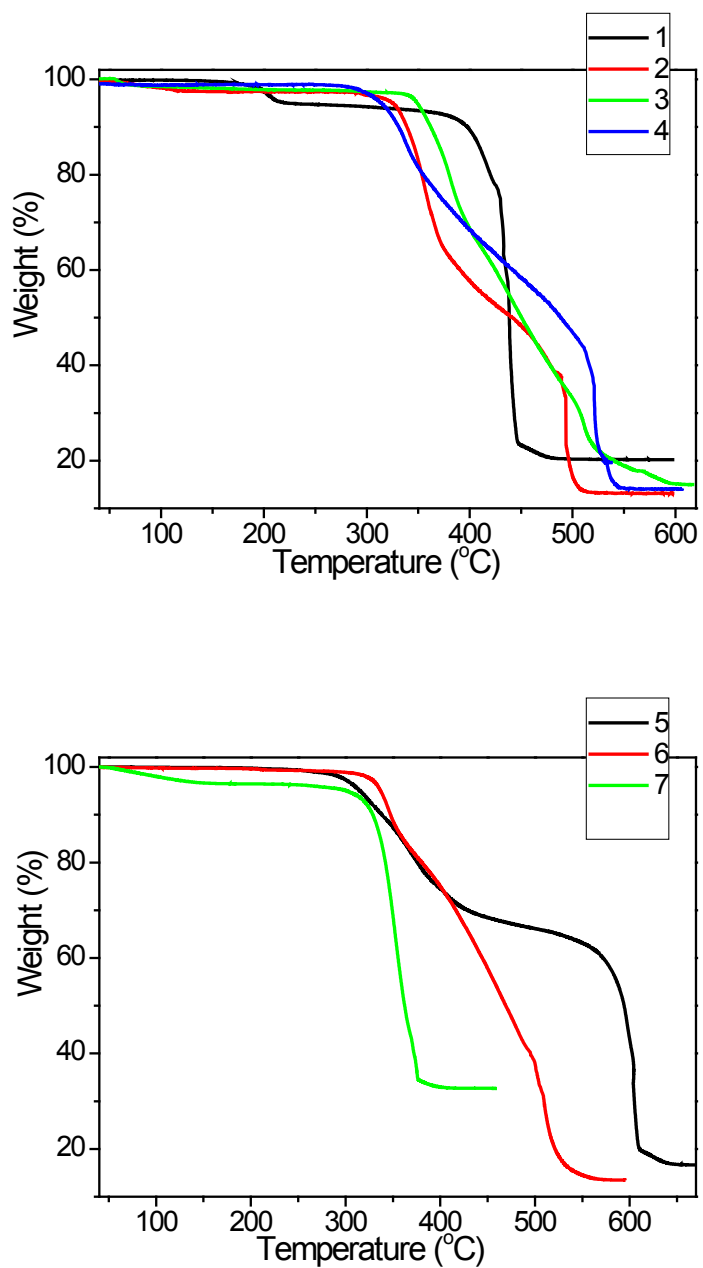

**Fig. S3.** TGA curves of compounds **1-7**.

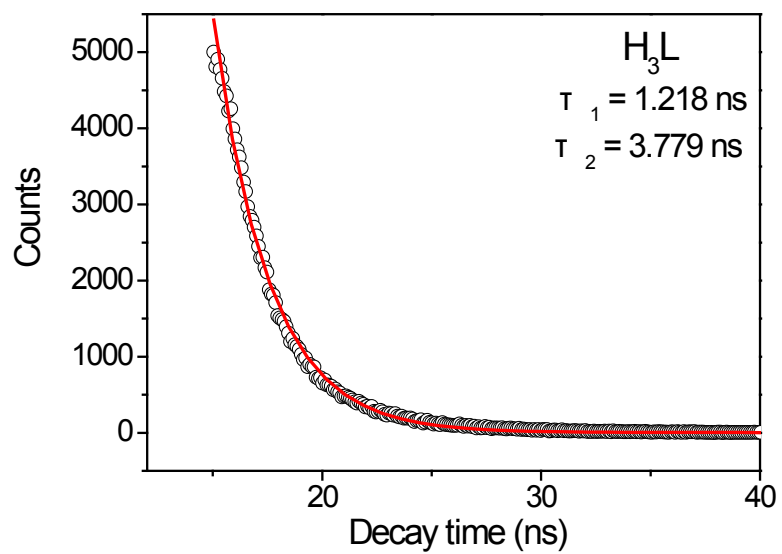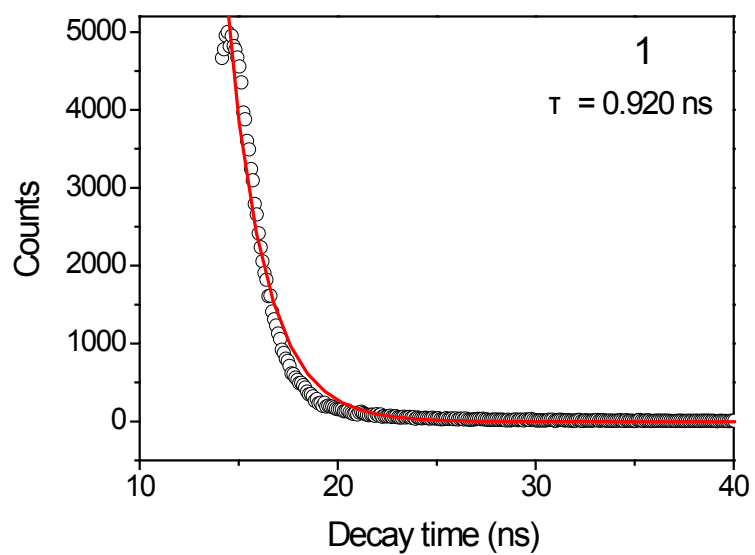

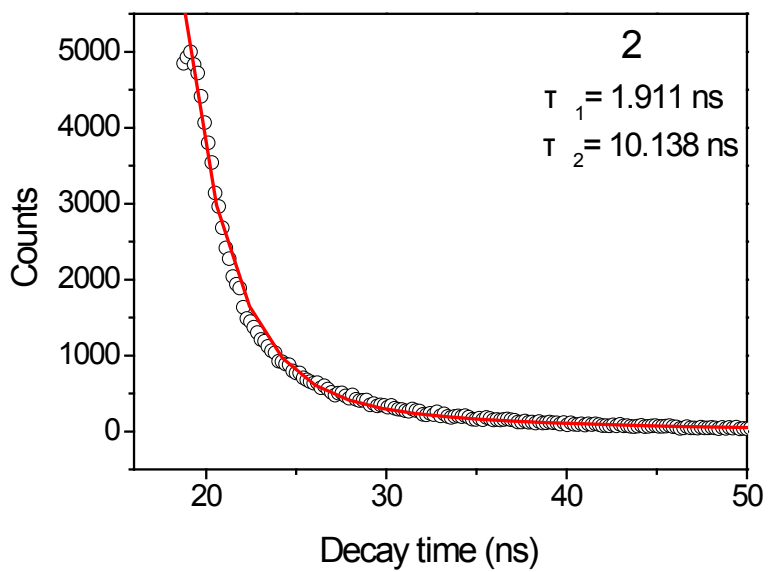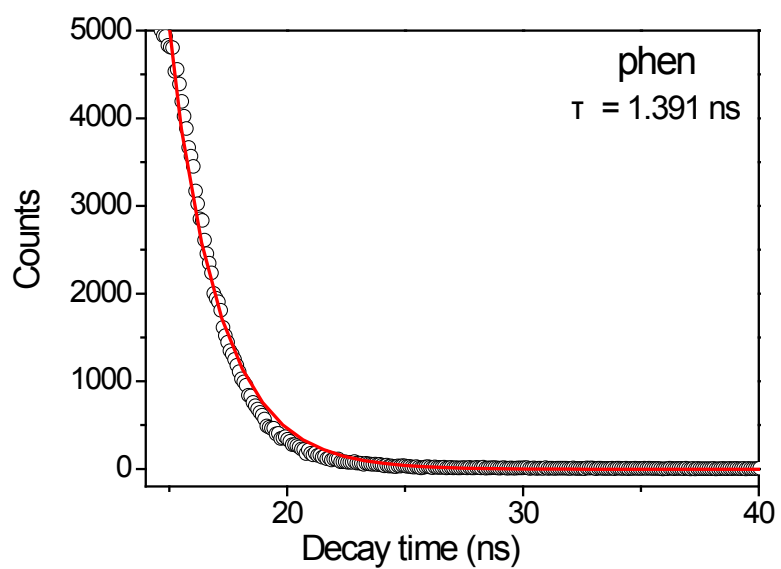



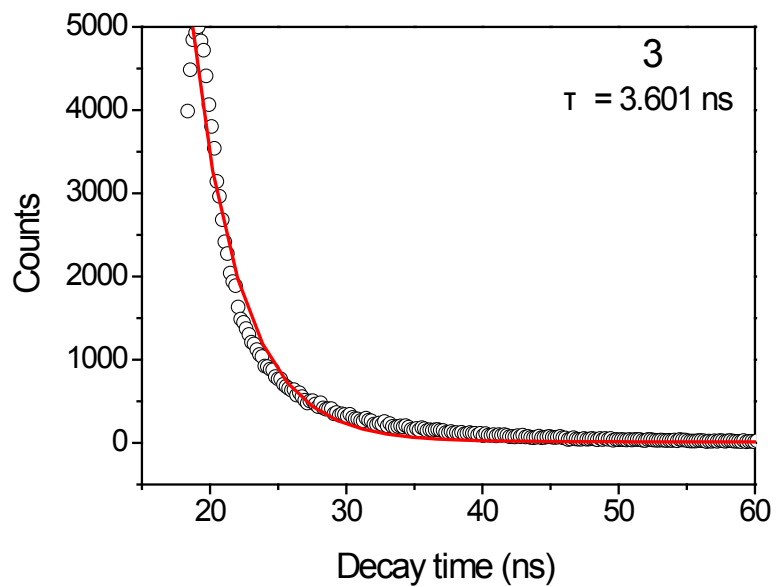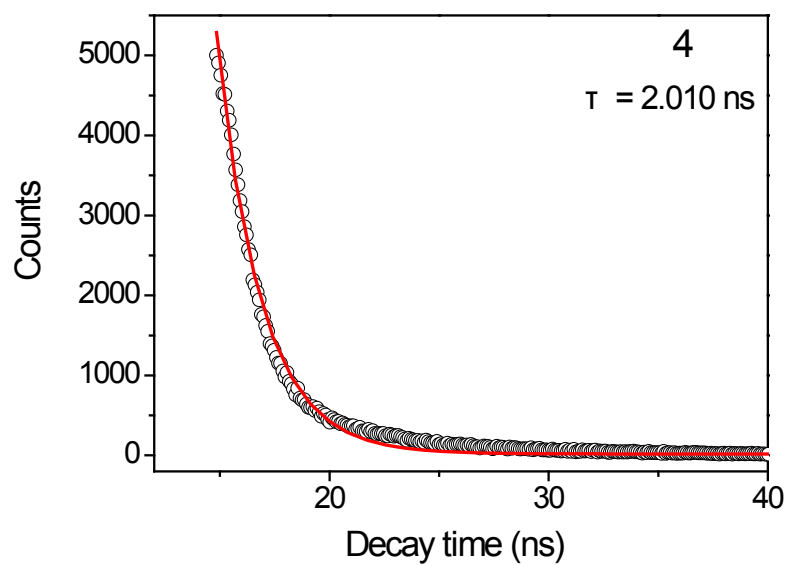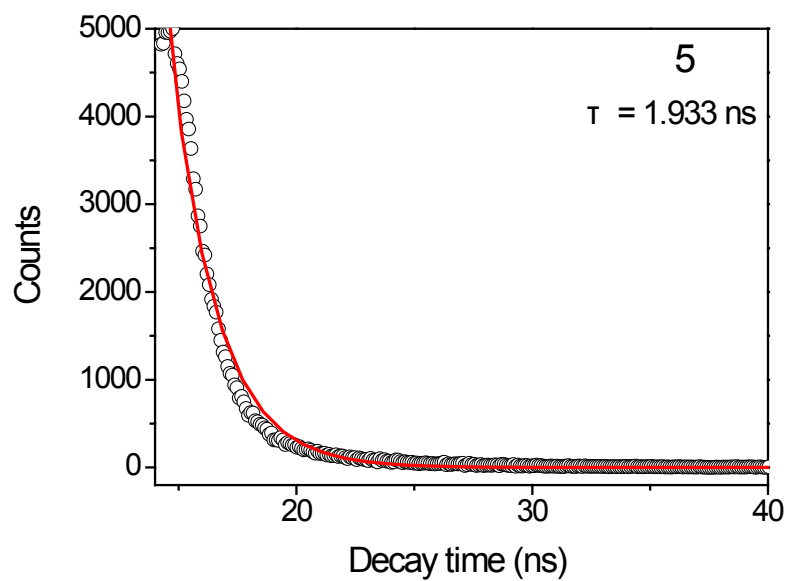

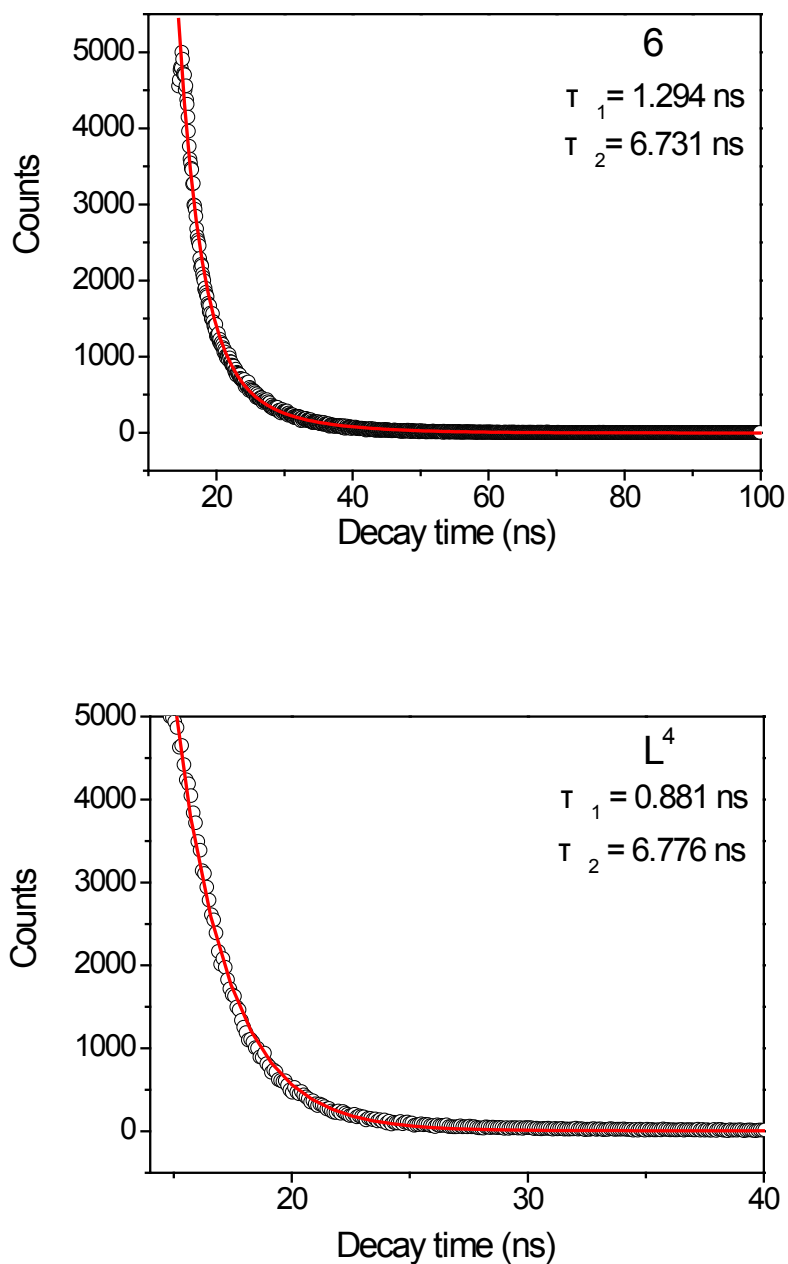

**Fig. S4.** Luminescence decay curves for compounds **1-6** (the black circles represent experimental data, and the solid red lines represent fitting results, H<sub>3</sub>L:  $\lambda_{\text{ex}} = 364$  nm,  $\lambda_{\text{em}} = 392$  nm; **1**:  $\lambda_{\text{ex}} = 358$  nm,  $\lambda_{\text{em}} = 413$  nm; **2**:  $\lambda_{\text{ex}} = 372$  nm,  $\lambda_{\text{em}} = 424$  nm; phen:  $\lambda_{\text{ex}} = 325$  nm,  $\lambda_{\text{em}} = 380$  nm; **3**:  $\lambda_{\text{ex}} = 372$  nm,  $\lambda_{\text{em}} = 426$  nm; **4**:  $\lambda_{\text{ex}} = 352$  nm,  $\lambda_{\text{em}} = 423$  nm; **5**:  $\lambda_{\text{ex}} = 353$  nm,  $\lambda_{\text{em}} = 395$  nm; **6**:  $\lambda_{\text{ex}} = 353$  nm,  $\lambda_{\text{em}} = 462$  nm; L<sup>4</sup>:  $\lambda_{\text{ex}} = 305$  nm,  $\lambda_{\text{em}} = 443$  nm).

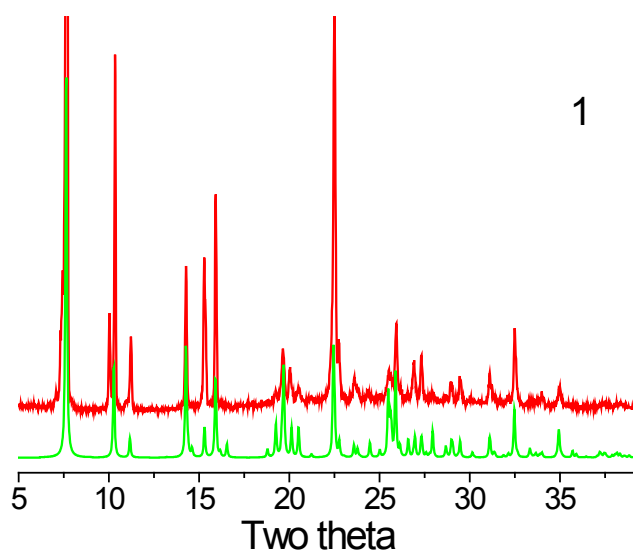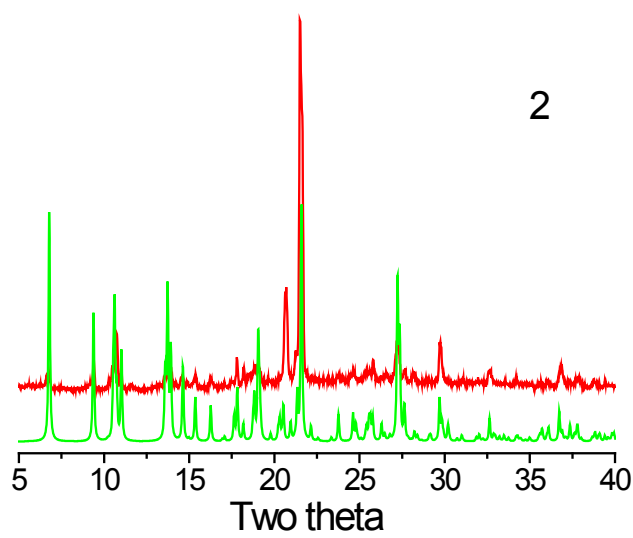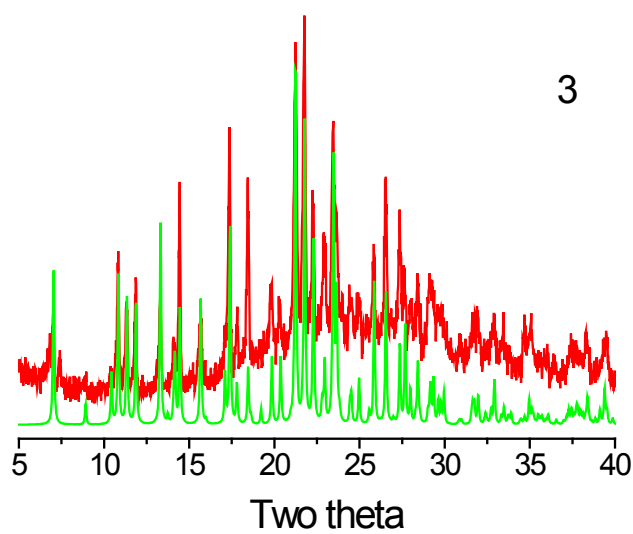

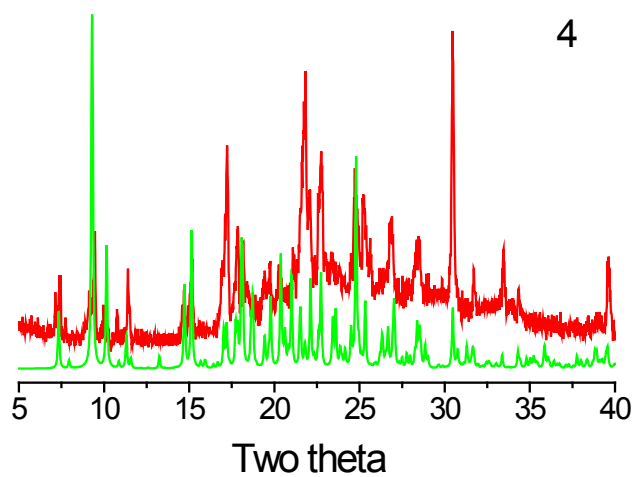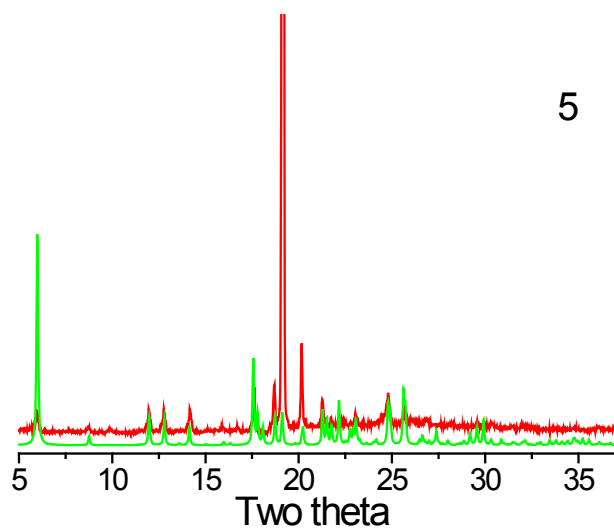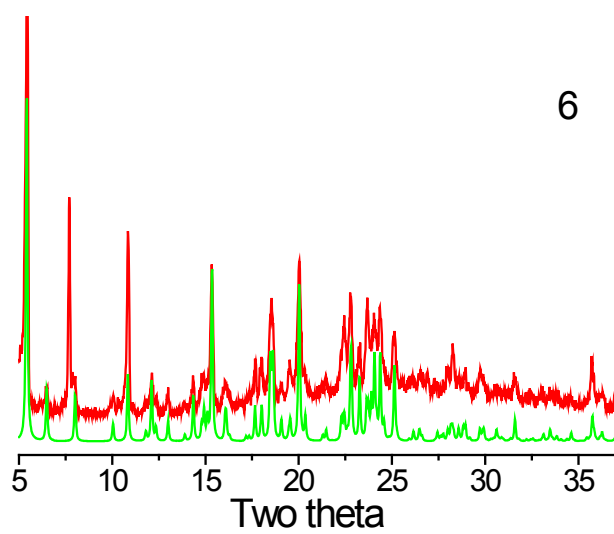

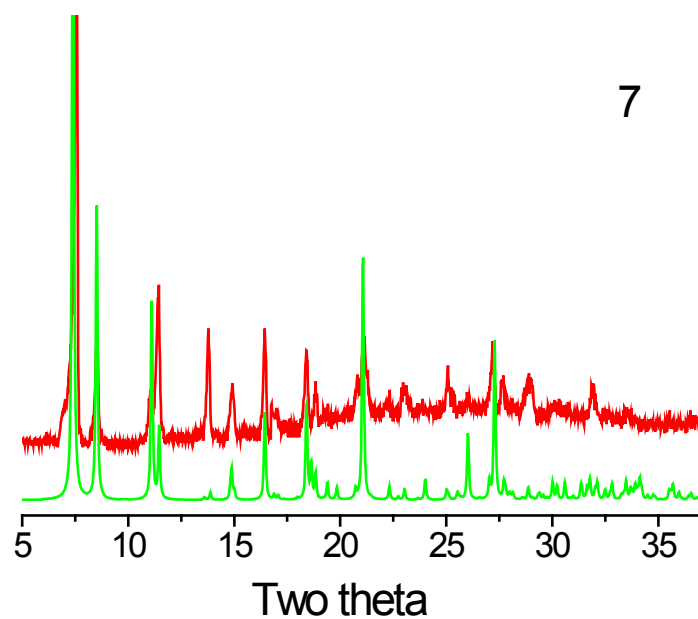

**Fig. S5** The simulated (green) and experimental (red) XRPD patterns for the compounds **1-7** (the diffraction peaks of both simulated and experimental patterns match well in relevant positions, indicating that the phase purities of compounds **1-7** are good).
